# Supplementary material for: The Effectiveness of Cannabis Flower for Immediate Relief from Symptoms of Depression
Source: PubMed Central journal article supplement — Yale J Biol Med. 2020 Jun 29;93(2):251–64. (PMC7309674), 2020-06-29
Supplement: yjbm_93_2_251_appendix.pdf [file yjbm_93_2_251_appendix.pdf]

## Appendix A: Supplementary Materials

Data Availability: The data that support the findings of this study are available from MoreBetter Ltd.

but restrictions apply to the availability of these data, which were used under license for the current

study, and so are not publicly available. Data are however available from the authors upon

reasonable request and with permission of MoreBetter Ltd.

Supplemental Table 1: Descriptive statistics for side effects.

| Side Effect | % Sessions Reporting | Symptom Relief | P-value | Category |
|-------------|----------------------|----------------|---------|----------|
| Anxious     | 11%                  | -3.21          | <0.001  | Negative |
| Clumsy      | 8%                   | -4.33          | <0.001  | Negative |
| Confused    | 7%                   | -3.99          | <0.001  | Negative |
| Coughing    | 15%                  | -4.00          | <0.001  | Negative |
| Dizzy       | 11%                  | -4.20          | <0.001  | Negative |
| Dry Mouth   | 33%                  | -3.83          | <0.001  | Negative |
| Foggy       | 27%                  | -3.64          | <0.001  | Negative |
| Forgetful   | 16%                  | -4.00          | <0.001  | Negative |
| Headache    | 7%                   | -3.25          | <0.001  | Negative |
| Irritable   | 7%                   | -3.11          | <0.001  | Negative |
| Nausea      | 3%                   | -3.44          | <0.001  | Negative |
| Paranoid    | 5%                   | -4.18          | <0.001  | Negative |
| Rapid Pulse | 6%                   | -4.55          | <0.001  | Negative |
| Red Eyes    | 20%                  | -3.87          | <0.001  | Negative |
| Restless    | 12%                  | -3.43          | <0.001  | Negative |
| Scattered   | 21%                  | -3.62          | <0.001  | Negative |
| Unmotivated | 20%                  | -3.71          | <0.001  | Negative |
| Active      | 9%                   | -3.95          | <0.001  | Positive |
| Chill       | 54%                  | -3.67          | <0.001  | Positive |
| Clear       | 23%                  | -3.86          | <0.001  | Positive |
| Comfy       | 41%                  | -3.99          | <0.001  | Positive |
| Creative    | 17%                  | -4.41          | <0.001  | Positive |

|             |     |       |        |                  |
|-------------|-----|-------|--------|------------------|
| Dreamy      | 39% | -3.83 | <0.001 | Positive         |
| Energetic   | 14% | -4.10 | <0.001 | Positive         |
| Focused     | 24% | -3.91 | <0.001 | Positive         |
| Frisky      | 12% | -4.36 | <0.001 | Positive         |
| Grateful    | 25% | -4.07 | <0.001 | Positive         |
| Great       | 22% | -4.45 | <0.001 | Positive         |
| Happy       | 32% | -4.21 | <0.001 | Positive         |
| Light       | 29% | -4.10 | <0.001 | Positive         |
| Optimistic  | 27% | -4.15 | <0.001 | Positive         |
| Peaceful    | 57% | -3.87 | <0.001 | Positive         |
| Productive  | 15% | -4.04 | <0.001 | Positive         |
| Reflective  | 32% | -3.83 | <0.001 | Positive         |
| Relaxed     | 64% | -3.76 | <0.001 | Positive         |
| Tuned       | 26% | -4.19 | <0.001 | Positive         |
| Couchlocked | 22% | -3.91 | <0.001 | Context-Specific |
| Distracted  | 19% | -3.74 | <0.001 | Context-Specific |
| High        | 53% | -3.78 | <0.001 | Context-Specific |
| Hungry      | 23% | -4.05 | <0.001 | Context-Specific |
| Silly       | 17% | -4.55 | <0.001 | Context-Specific |
| Sleepy      | 23% | -3.95 | <0.001 | Context-Specific |
| Talkative   | 13% | -4.59 | <0.001 | Context-Specific |
| Thinky      | 25% | -3.81 | <0.001 | Context-Specific |
| Thirsty     | 30% | -4.01 | <0.001 | Context-Specific |
| Tingly      | 31% | -3.96 | <0.001 | Context-Specific |
| Visuals     | 6%  | -5.18 | <0.001 | Context-Specific |

Notes: Side effects are categorized according to their visceral descriptions under varying circumstances. The average symptom relief among users that indicated each side effect and the associated p-value of symptom intensity changes for individuals that indicated each side effect are reported.
